# Supplementary material for: Computational modelling predicts substantial carbon assimilation gains for C3 plants with a single-celled C4 biochemical pump
Source: PubMed Central journal article supplement (PMC6786660; doi:10.1371/journal.pcbi.1007373), 2019-09-30

# Computational modelling predicts substantial carbon assimilation gains for C<sub>3</sub> plants with a single-celled C<sub>4</sub> biochemical pump

Ivan Jurić<sup>a,\*</sup>, Julian M. Hibberd<sup>b</sup>, Mike Blatt<sup>c</sup>, Nigel J. Burroughs<sup>a,\*</sup>

<sup>a</sup>*Warwick Systems Biology Centre, University of Warwick, Coventry, CV4 7AL, UK*

<sup>b</sup>*Department of Plant Sciences, University of Cambridge, Cambridge, CB2 3EA, UK*

<sup>c</sup>*Laboratory of Plant Physiology and Biophysics, University of Glasgow, Glasgow, G12 8QQ, UK*

---

---

## Supplementary Figures

---

\*Corresponding authors. Emails: [i.juric@warwick.ac.uk](mailto:i.juric@warwick.ac.uk), [n.j.burroughs@warwick.ac.uk](mailto:n.j.burroughs@warwick.ac.uk).

Figure A: Bicarbonate concentration and C<sub>4</sub> photosynthesis: (a): HCO<sub>3</sub><sup>-</sup> concentration in the chloroplast stroma as function of the envelope permeability and PEPC concentration in the cytoplasm for default choice of parameter values (Table 1 in the main text). (b): the corresponding HCO<sub>3</sub><sup>-</sup> concentration in the cytoplasm.

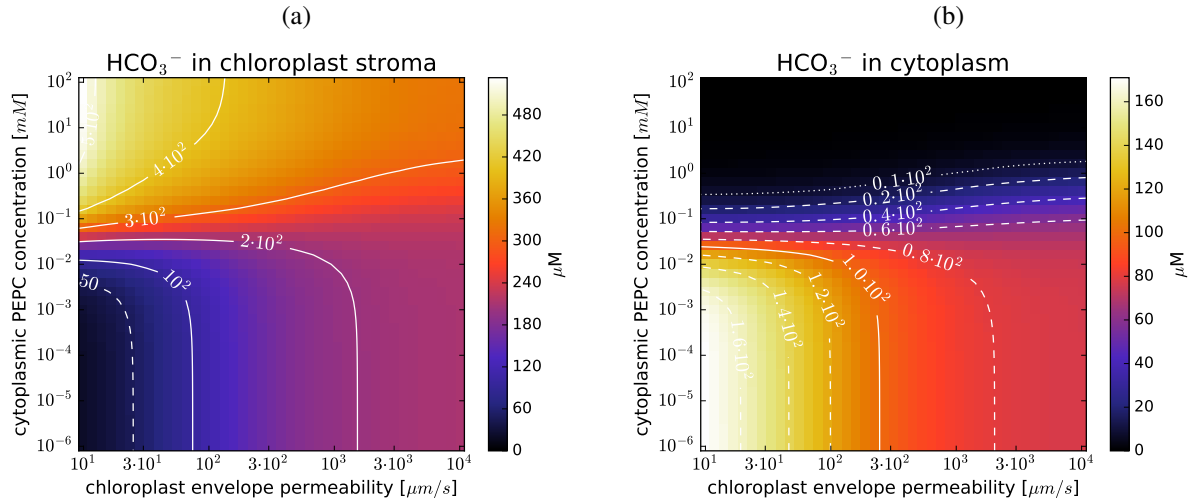

Figure B: Photon cost and ATP-synthase efficiency: (a) and (b): the photon cost as a function of the envelope permeability and PEPC concentration in the cytoplasm for two possible proton-to-ATP stoichiometries of the chloroplatic ATP synthase. (a): proton-to-ATP stoichiometry of 12:3 (the default used throughout this article); (b): proton-to-ATP stoichiometry of 14:3. The base photon costs of RuBP regeneration, photorespiration, and pyruvate-to-PEP conversion used to evaluate (b) are  $\varphi_{Calvin} = 9$ ,  $\varphi_{phresp} = 10\frac{1}{6}$ , and  $\varphi_{C4} = 4\frac{2}{3}$ .

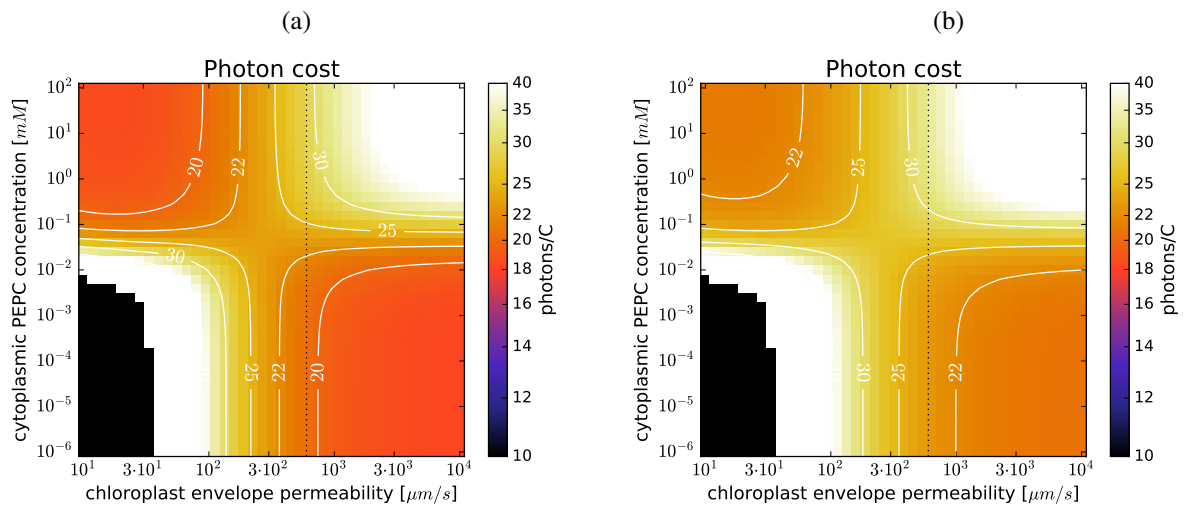

Figure C:  $C_4$  photosynthesis at different IAS  $CO_2$  levels: The photon cost as a function of the envelope permeability ( $\sigma_P$ ) and PEPC concentration in the cytoplasm ( $c_P$ ) at  $p_{CO_2} = 150 \mu\text{bar}$  (a),  $p_{CO_2} = 250 \mu\text{bar}$  (b), and  $p_{CO_2} = 400 \mu\text{bar}$  (c). The dotted vertical marks the threshold envelope permeability below which the  $C_4$  cycle is cost-efficient.

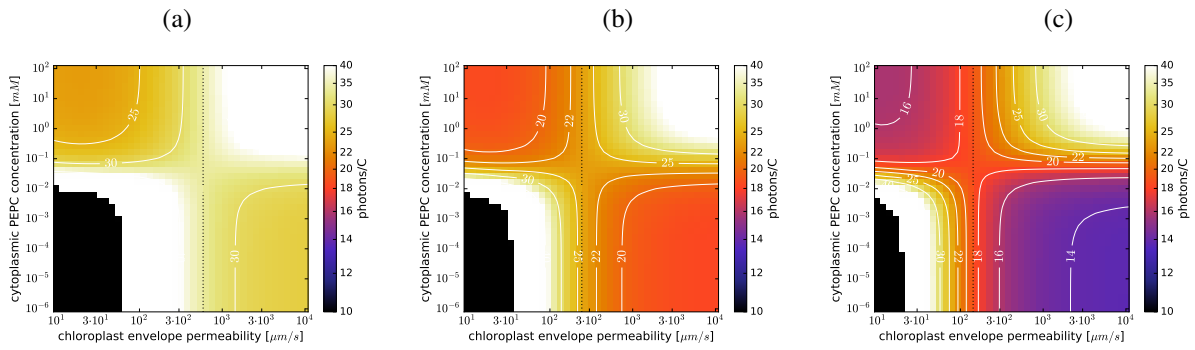

Figure D: Cytoplasmic CA and  $C_3$  photosynthesis. The assimilation rate gain (blue) and the photon cost reduction (red) as functions of CA effectiveness ( $\eta_{CA}$ ) for the chloroplast envelope permeability of  $600 \mu\text{m/s}$ . Solid lines are for the case where CA effectiveness is increased only in the chloroplast stroma; dashed lines are for the case where CA effectiveness increases both in the stroma and in the cytoplasm. The vertical dotted line marks the boost factor used as default in other figures.

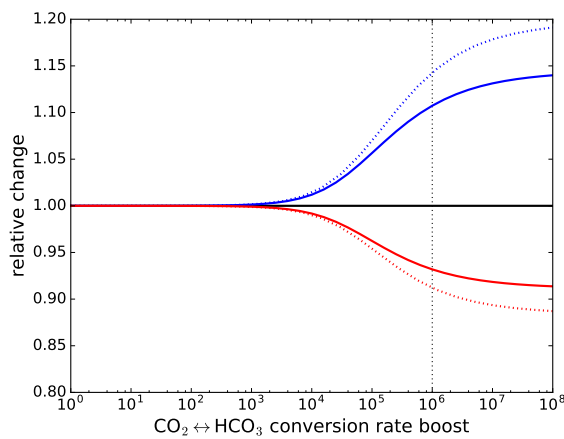

Figure E: CA efficacy vs. envelope permeability in  $C_3$  photosynthesis. (a) and (b): Relative increase in carbon assimilation rate and reduction in photon cost due to presence of CA in the chloroplast stroma, as functions of the envelope permeability ( $\sigma_P$ ) and the  $CO_2/HCO_3^-$  interconversion rate boost ( $\eta_{CA}$ ); for  $p_{CO_2} = 250 \mu\text{bar}$  and  $\sigma_C = 200 \mu\text{m/s}$ . (c) and (d): Same as (a) and (b) for the case when CA is present both in the stroma and in the cytoplasm.

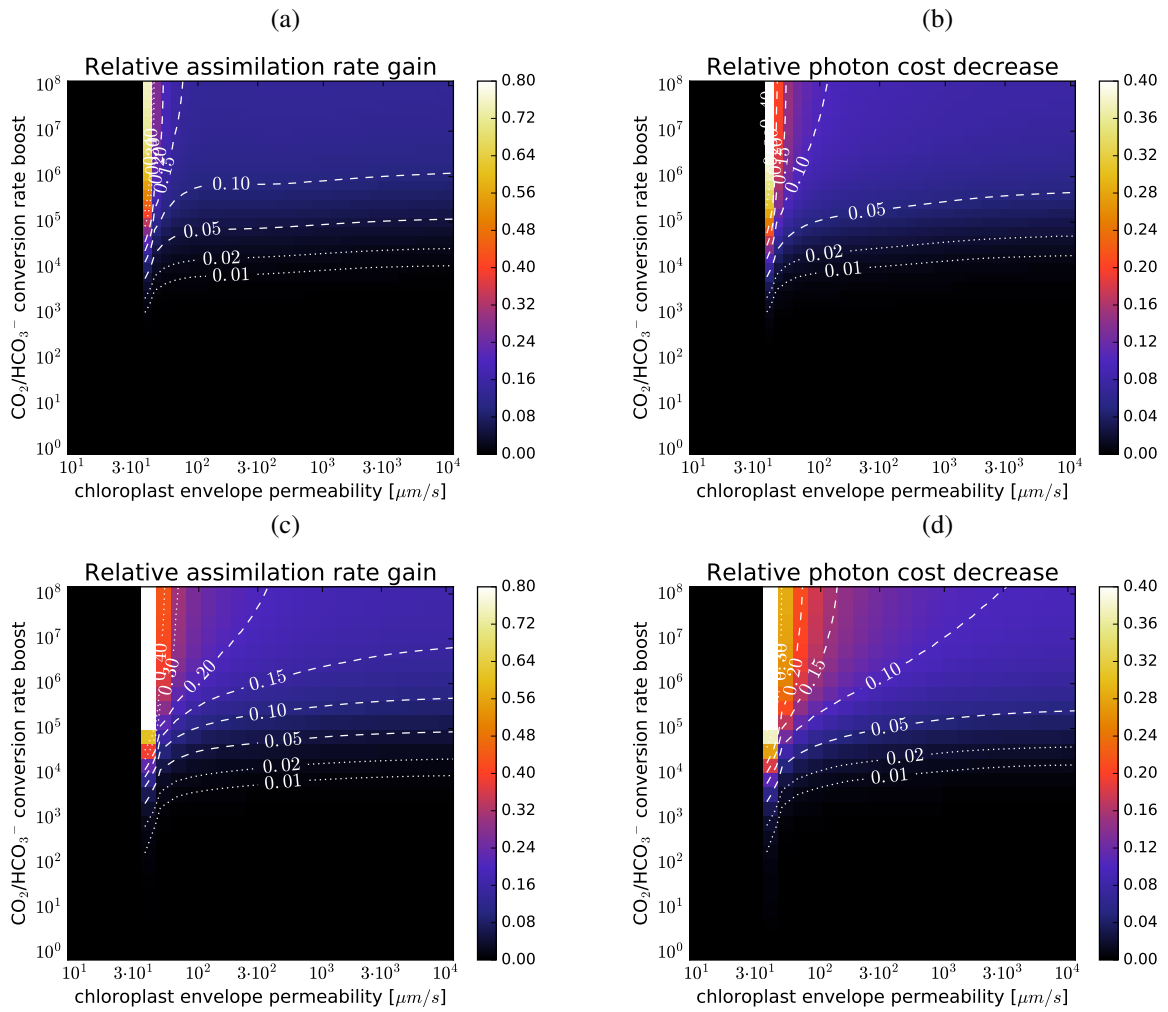

Figure F: CA efficacy and C<sub>4</sub> photosynthesis: (a) and (b): the photon cost and the net assimilation rate as functions of the CO<sub>2</sub> ↔ HCO<sub>3</sub><sup>-</sup> conversion rate boost due to cytoplasmic CA ( $\eta_{CA}$ ) and PEPC concentration in the cytoplasm ( $c_P$ ), for the default parameter choice (Table 1 in the main text). (c) and (d): the photon cost and the net assimilation rate as functions of the envelope permeability ( $\sigma_P$ ) and PEPC concentration in the cytoplasm ( $c_P$ ), when cytoplasmic CA is insufficient ( $\eta_{CA} = 10^4$ ). The vertical dotted lines mark the values used as defaults in other figures. The green lines in (b) and (d) mark the light-utilisation thresholds (in mol m<sup>-3</sup>s<sup>-1</sup>).

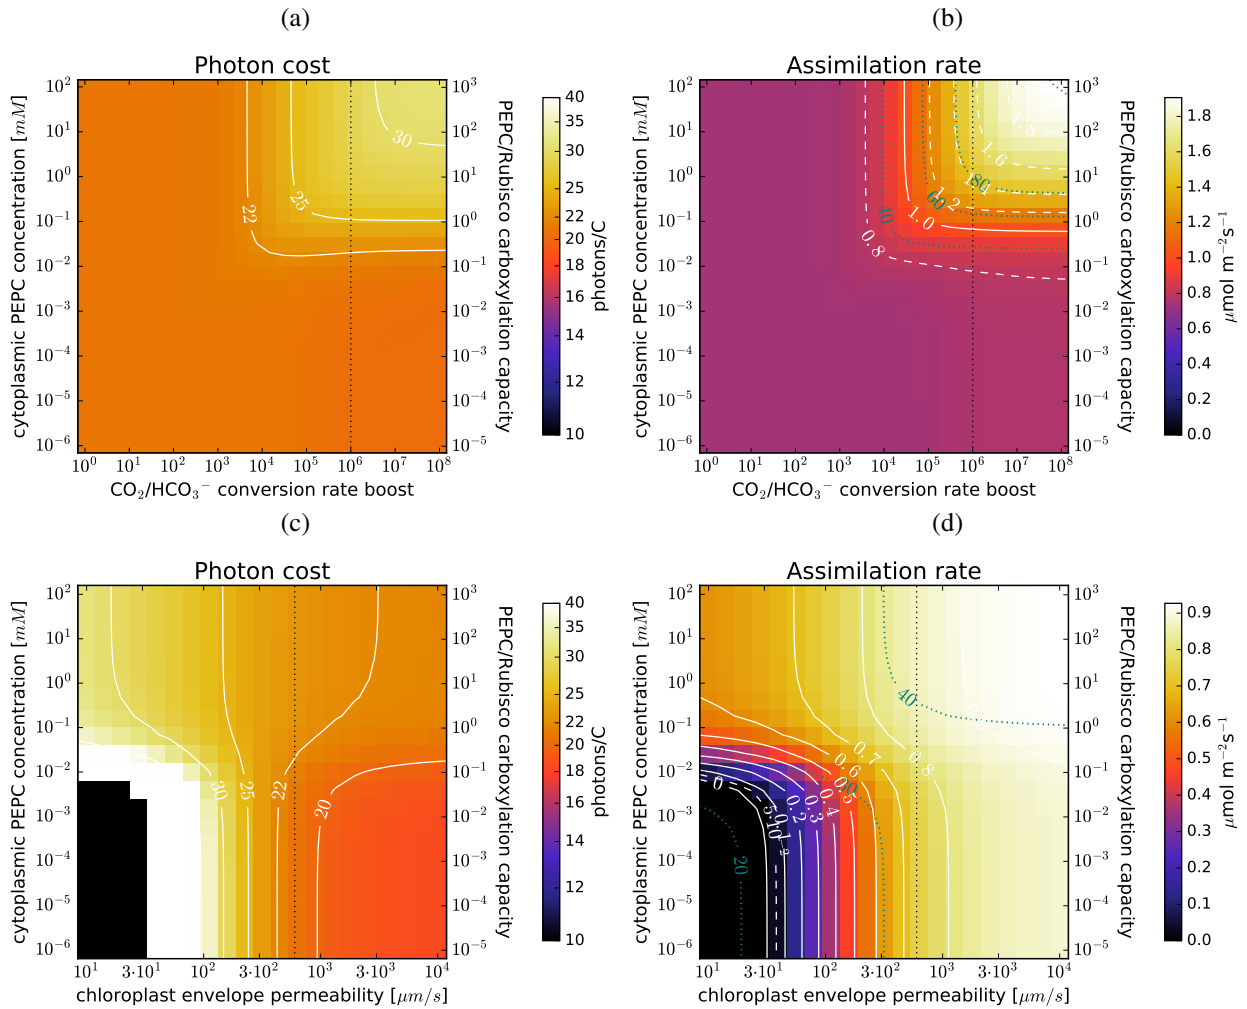

Figure G: Vacuole impact on  $C_4$  photosynthesis: (a) and (b): The photon cost and the assimilation rate as functions of the vacuole membrane permeability  $\sigma_V$  and the cytoplasmic PEPC level ( $c_P$ ), at  $\sigma_C = 200 \mu\text{m/s}$ ,  $\sigma_P = 600 \mu\text{m/s}$ , and  $p_{CO_2} = 250 \mu\text{bar}$ . (c) and (d): The assimilation rate as a function of the drop of the vacuole ( $d_V$ ) (which reduces the cytoplasmic volume) and the PEPC concentration (c) or the PEPC-to-Rubisco carboxylation capacity ratio (d). Parameters same as above, with  $\sigma_V = 2\sigma_P = 1200 \mu\text{m/s}$ . The green lines in (b-d) mark the light-utilisation thresholds (in  $\text{mol m}^{-3}\text{s}^{-1}$ ).

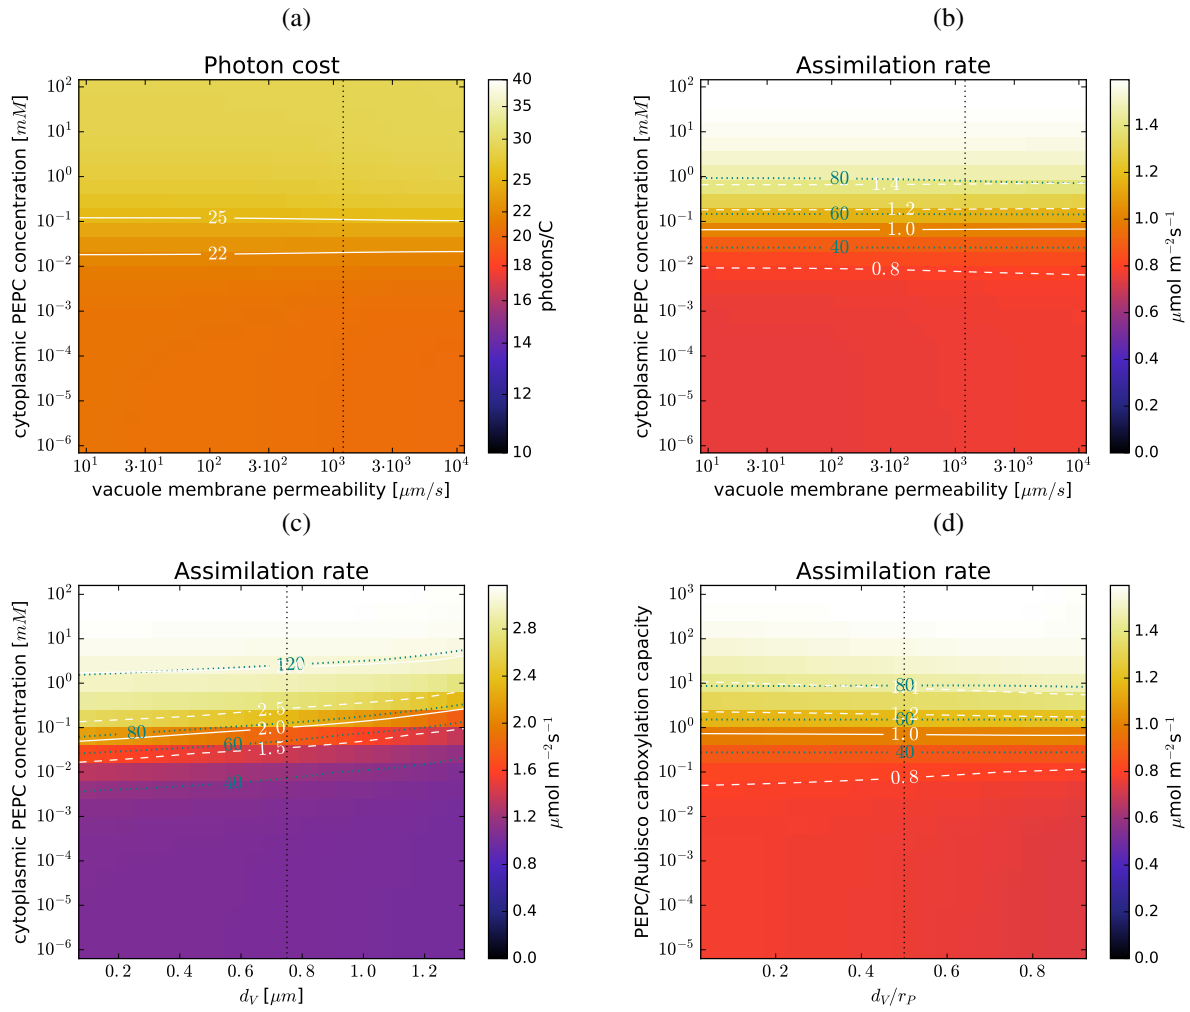

Figure H: Cell wall permeability and C<sub>4</sub> photosynthesis: (a) and (b): the photon cost and the net assimilation rate as functions of the combined permeability of the cell wall and plasmalemma ( $\sigma_C$ ) and PEPC concentration in the cytoplasm ( $c_P$ ), for the default parameter choice (Table 1 in the main text). The vertical dotted line marks the permeability used as default in other figures. The green lines in (b) mark the light-utilisation thresholds (in  $\text{mol m}^{-3}\text{s}^{-1}$ ).

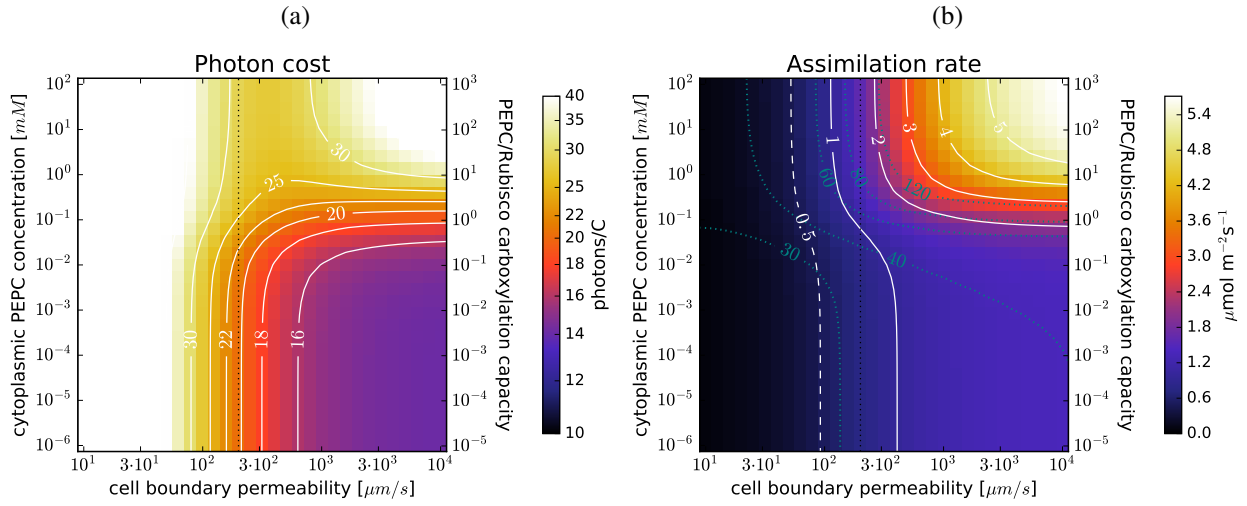

Figure I: Chloroplast envelope permeability to bicarbonate and C<sub>4</sub> photosynthesis: (a) and (b): the photon cost and the net assimilation rate as functions of the chloroplast envelope permeability to  $\text{HCO}_3^-$  and PEPC concentration in the cytoplasm, for the default parameter choice (Table 1 in the main text). The vertical dotted line marks the permeability used as default in other figures. The green lines in (b) mark the light-utilisation thresholds (in  $\text{mol m}^{-3}\text{s}^{-1}$ ).

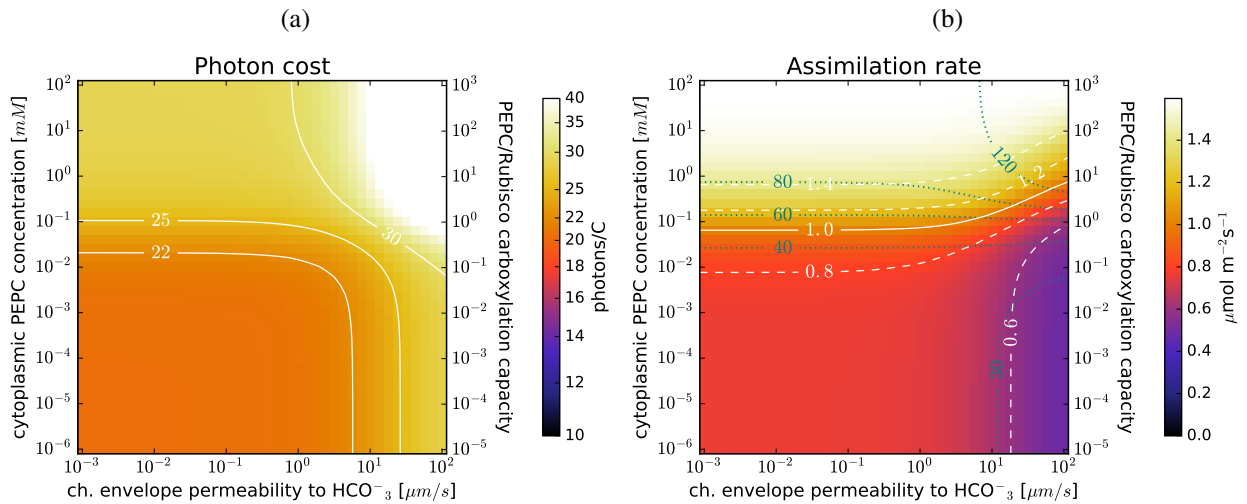

Figure J: Mesh precision: (a) and (b): the examples of meshing used for FEM integration at two different levels of precision. The mesh in (a) consists of 1084 triangle elements, while the mesh in (b) has 30492. The relative difference in integrated quantities (e.g. photon cost, carbon assimilation) in converged test runs on these two meshes is less than  $2 \cdot 10^{-4}$ . The meshing used to calculate the results presented in the paper used a medium level of precision, between the extremes of (a) and (b), with 6057 triangle elements in the default parameter case. (Note: the meshes in (a) and (b) do not represent the default geometry, but the the following:  $r_p = 1 \mu\text{m}$ ,  $\phi_{plas/cell} = 25\%$ ,  $d_{sep} = 0.03 \mu\text{m}$ ,  $\theta_{mem} = 0.01 \mu\text{m}$ ,  $d_V = 0.3 \mu\text{m}$ , and  $h_V = 1.5 \mu\text{m}$ .)

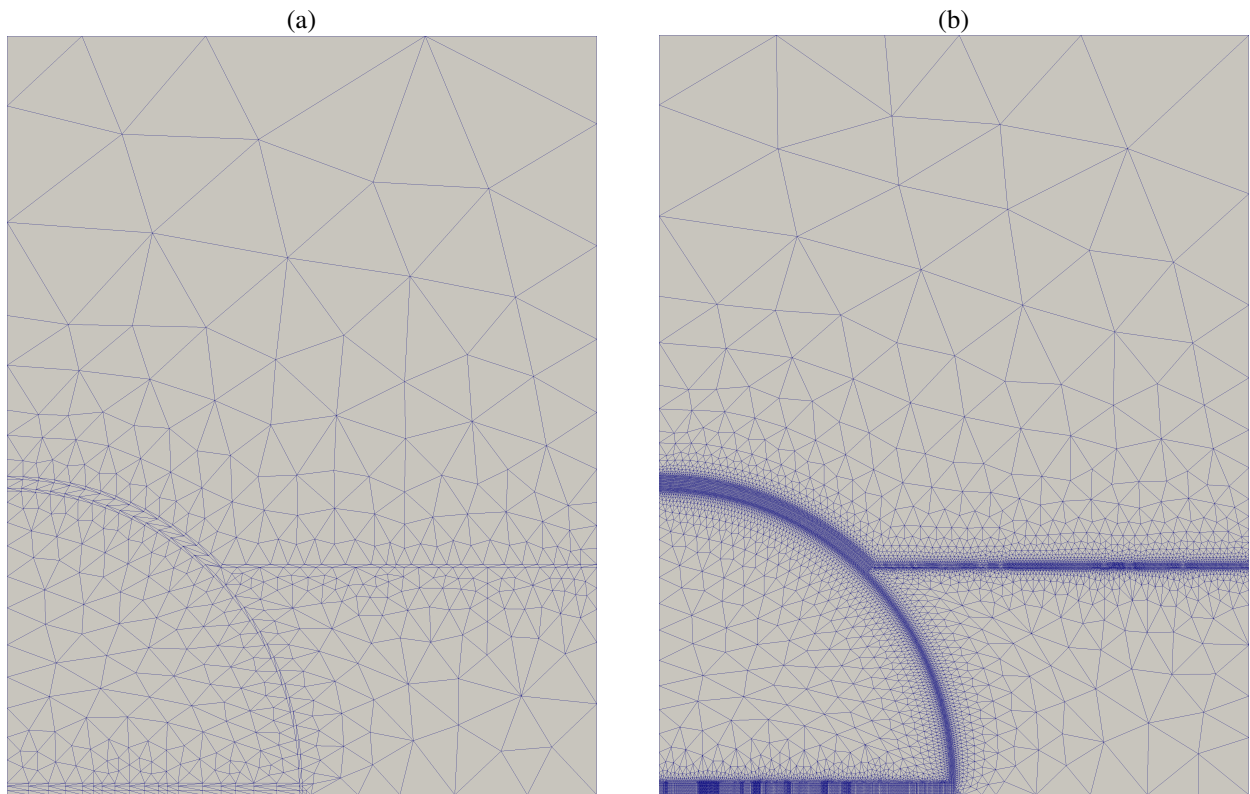



Figure K: Exemplary solutions: the top row - the concentration of  $\text{CO}_2/\text{O}_2/\text{HCO}_3^-$ ; the middle and the bottom row - the radial and axial component of the respective diffusion current vectors. The left side shows a  $\text{C}_3$  photosynthesis case, with the permeabilities  $\sigma_P = \sigma_C = \frac{1}{2}\sigma_V = 10^3 \mu\text{m/s}$ ,  $p_{\text{CO}_2} = 200 \mu\text{bar}$ , and other parameters at their default values (Table 1 in the main text). The right side shows a  $\text{C}_4$  photosynthesis case for the same choice of parameters and PEPC concentration  $c_P = 1.1 \text{ mM}$ . The colour scale selected for concentrations differs between  $\text{CO}_2$  (linear scale from 0 to  $16 \mu\text{M}$ ),  $\text{O}_2$  (linear scale from 284 to  $299 \mu\text{M}$ ), and  $\text{HCO}_3^-$  (logarithmic scale from  $8 \cdot 10^{-4}$  to  $8 \cdot 10^{-1} \text{ M}$ ), but is the same in the  $\text{C}_3$  and the  $\text{C}_4$  case. The current scales are the same for all cases, with the orange colours representing a diffusion current component oriented toward the axis/bottom, and the blue colours representing a component oriented away from the axis/bottom.

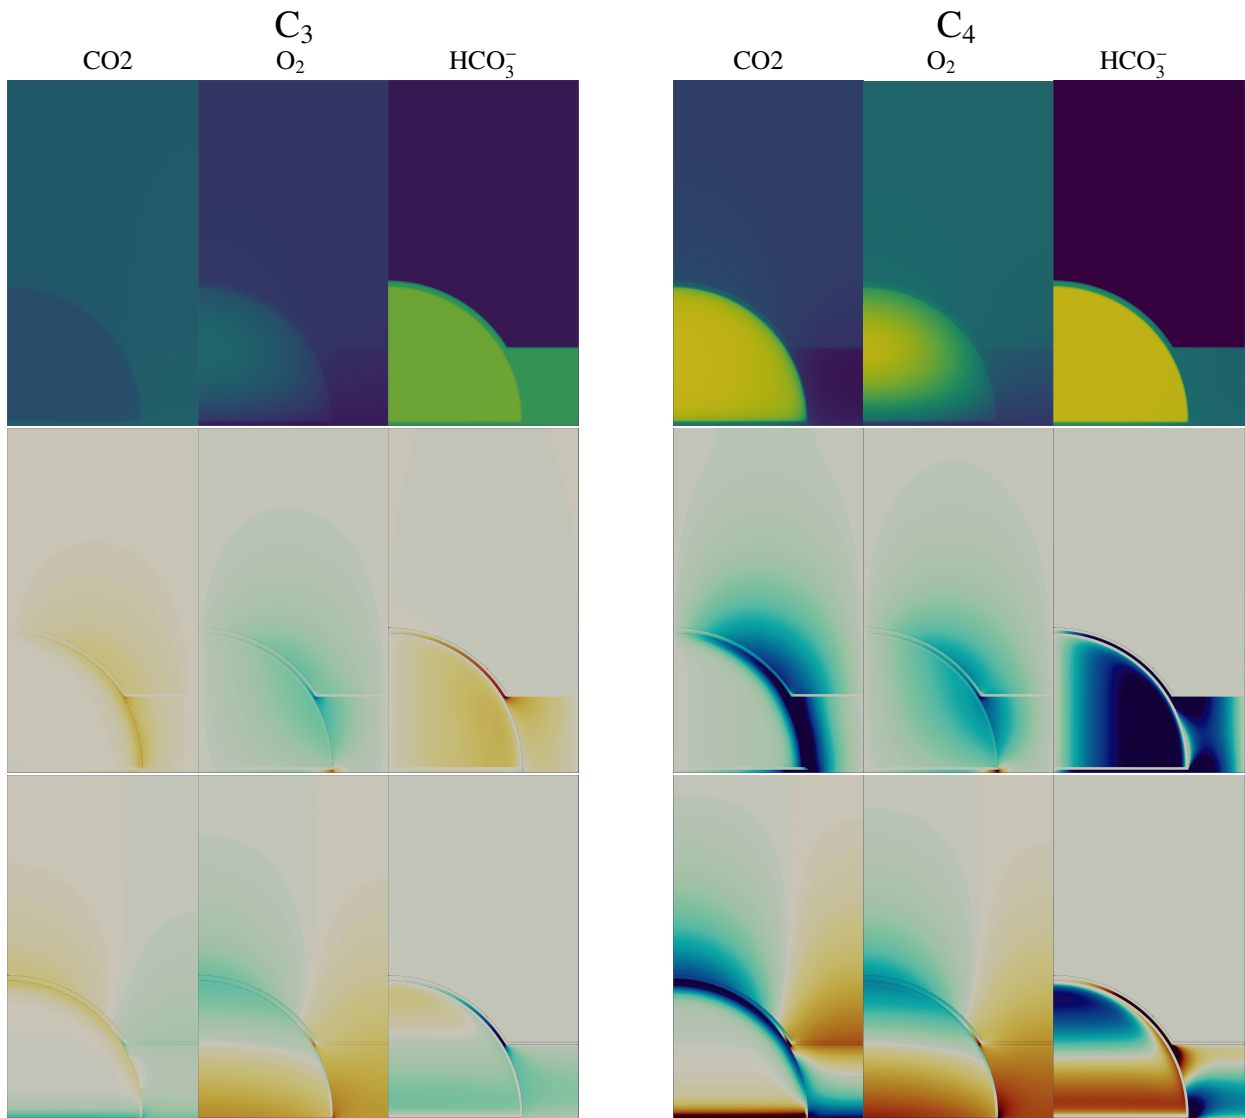

Supplement: pcbi.1007373.s001.pdf [file pcbi.1007373.s001.pdf]
