# Supplementary material for: Computational modelling predicts substantial carbon assimilation gains for C3 plants with a single-celled C4 biochemical pump
Source: PubMed Central journal article supplement (PMC6786660; doi:10.1371/journal.pcbi.1007373), 2019-09-30
Supplement: pcbi.1007373.s002.pdf [file pcbi.1007373.s002.pdf]

# Computational modelling predicts substantial carbon assimilation gains for C<sub>3</sub> plants with a single-celled C<sub>4</sub> biochemical pump

Ivan Jurić<sup>a,\*</sup>, Julian M. Hibberd<sup>b</sup>, Mike Blatt<sup>c</sup>, Nigel J. Burroughs<sup>a,\*</sup>

<sup>a</sup>Warwick Systems Biology Centre, University of Warwick, Coventry, CV4 7AL, UK

<sup>b</sup>Department of Plant Sciences, University of Cambridge, Cambridge, CB2 3EA, UK

<sup>c</sup>Laboratory of Plant Physiology and Biophysics, University of Glasgow, Glasgow, G12 8QQ, UK

---

---

## Supplementary Information

### 1 Mathematical outline of the model

2 We will use uppercase subscripts - O, C, and B - to denote the chemical species: O<sub>2</sub>, CO<sub>2</sub>, and HCO<sub>3</sub><sup>-</sup> respectively.  
3 The lower case subscripts - p, c, v - will denote the three spatial regions considered: the *plastid*, the *cytosol*, and the  
4 *vacuole*. The same subscripts will also be used for the outer boundaries of these regions: the *plastid envelope*, the *cell*  
5 *wall and membrane*, and the *vacuole membrane*.

6 To find the gas currents under steady-state photosynthesis we need to solve the system of stationary diffusion-  
7 reaction equations for position-dependent concentrations of oxygen, carbon-dioxide, and bicarbonate -  $n_O$ ,  $n_C$ , and  $n_B$   
8 - satisfying appropriate boundary constraints and flux-balance conditions. The equations are of the form

$$9 \quad D_i \nabla^2 n_i - r_i(\mathbf{n}) + s_i = 0 \quad (1)$$

10 where the index  $i$  stand for  $C$ ,  $O$ , and  $B$  respectively.  $D_i$  is the compartment-dependent diffusion coefficient.  $r_i$  and  $s_i$   
11 are the reaction and source terms. Both will depend on the location (the compartments, i.e. stroma, cytoplasm, and  
12 vacuole, or the intramembrane and intraenvelope spaces). The reaction term may in principle depend on the local  
13 value of any of the three concentrations, which we subsume into a ‘vector’ form  $\mathbf{n} \equiv (n_O, n_C, n_B)$ . The source terms  
14 are determined by flux-balance conditions to be addressed later. As all of the terms depend on the compartmental  
15 location, we introduce characteristic functions  $\chi_p(\mathbf{r})$ ,  $\chi_c(\mathbf{r})$ , and  $\chi_v(\mathbf{r})$ , which are equal to one if the position vector,  $\mathbf{r}$ ,  
16 is respectively within the plastid, cytoplasm, or vacuole, and zero otherwise. This way, we can specify the reaction  
17 terms as

$$18 \quad r_O(\mathbf{n}(\mathbf{r}), \mathbf{r}) = \chi_p(\mathbf{r}) v_{OC} \frac{n_O(\mathbf{r})}{n_O(\mathbf{r}) + n_C(\mathbf{r}) K_O / K_C + K_O} \quad (2)$$

$$19 \quad r_C(\mathbf{n}(\mathbf{r}), \mathbf{r}) = \chi_p(\mathbf{r}) v_{CC} \frac{n_C(\mathbf{r})}{n_C(\mathbf{r}) + n_O(\mathbf{r}) K_C / K_O + K_C} + v_{C \rightarrow B}(\mathbf{r}) n_C(\mathbf{r}) - v_{B \rightarrow C}(\mathbf{r}) n_B(\mathbf{r}) \quad (3)$$

---

\*Corresponding authors. Emails: i.juric@warwick.ac.uk, n.j.burroughs@warwick.ac.uk.

$$r_B(\mathbf{n}(\mathbf{r}), \mathbf{r}) = \chi_c(\mathbf{r})v_{BCP} \frac{n_B(\mathbf{r})}{n_B(\mathbf{r}) + K_B} - v_{C \rightarrow B}(\mathbf{r})n_C(\mathbf{r}) + v_{B \rightarrow C}(\mathbf{r})n_B(\mathbf{r}) \quad (4)$$

where we used stationary Michaelis-Menten forms for the competitive reaction of RuBP-primed RubisCO (concentration  $c_R$ ) with  $O_2$  and  $CO_2$  (see e.g. (1)), and for the reaction of the bicarbonate with PEPC (concentration  $c_P$ ).  $v_{C \rightarrow B}$  and  $v_{B \rightarrow C}$  are the forward and backward reaction rates for the  $CO_2$  to  $HCO_3^-$  interconversion. They will depend on the local pH value and on the presence or absence of the anhydrase. They are given by (2) as

$$v_{C \rightarrow B}(\mathbf{r}) = \eta_{CA}(\mathbf{r})v_{C \rightarrow B(\text{base})}(\mathbf{r}) = \eta_{CA}(\mathbf{r})(k_{CO_2} + k_{OH-K_w}/a_H(\mathbf{r})) \quad (5)$$

$$v_{B \rightarrow C}(\mathbf{r}) = \eta_{CA}(\mathbf{r})v_{B \rightarrow C(\text{base})}(\mathbf{r}) = \eta_{CA}(\mathbf{r})(k_d a_H(\mathbf{r}) + k_{HCO_3^-}) \quad (6)$$

$a_H(r)$  is the proton activity, given by the local pH,  $a_H = 10^{-pH}$  M, and  $\eta_{CA}$  is the CA-dependent reaction boost factor. It is equal one where CA is absent (e.g. vacuole), and to a large number ( $10^6$  by default) where CA is present (i.e. in the stroma and cytoplasm). The  $k$ -rates are taken from (2) as  $k_{CO_2} = 0.037 \text{ s}^{-1}$ ,  $k_{OH-K_w} = 7.1 \cdot 10^{-11} \text{ Ms}^{-1}$ ,  $k_d = 7.6 \cdot 10^4 \text{ M}^{-1} \text{ s}^{-1}$ , and  $k_{HCO_3^-} = 1.8 \cdot 10^{-4} \text{ s}^{-1}$ . The four rates correspond to two possible conversion pathways:  $CO_2 + H_2O \leftrightarrow HCO_3^- + H^+$  and  $CO_2 + OH^- \leftrightarrow HCO_3^-$ . We do not allow for the  $CO_2$ -bicarbonate interconversion in the intramembrane and intraenvelope space (since it is an hydrophobic environment), so  $v_{C \rightarrow B}$  and  $v_{B \rightarrow C}$  are set to zero there.

Modelling the effect of carbonic anhydrase with a simple scaling factor is possible because the CA-mediated reaction is reversible and thus preserves the detailed balance of back and forth conversion rates (as long as  $H^+$  and  $OH^-$  are in equilibrium). The scaling factor  $\eta_{CA}$  can be connected to CA concentration and its kinetic parameters as follows. The CA-mediated reaction can be expressed in a Michaelis-Menten form (e.g. (3))

$$v_{C \rightarrow B}n_C - v_{B \rightarrow C}n_B = \frac{c_{CA}(v'_{C \rightarrow B}K_B n_C - v'_{B \rightarrow C}K_C n_B)}{K_B K_C + K_B n_C + K_C n_B} \quad (7)$$

where  $v'$  are enzyme-substrate reaction rates, and  $K_B$  and  $K_C$  are characteristic  $HCO_3^-$  and  $CO_2$  concentrations. In principle  $\eta_{CA}$  would thus depend on local  $n_C$  and  $n_B$  concentrations, as these terms appear in the divisor. However, with  $K_B$  and  $K_C$  in  $10^0$  M and  $10^1$  M range respectively (3), the divisor can be approximated as  $K_B K_C$  and  $\eta_{CA}$  is approximately (for  $\eta_{CA} \gg 1$ )

$$\eta_{CA} = \frac{c_{CA}v'_{C \rightarrow B}}{K_C v_{C \rightarrow B(\text{base})}} = \frac{c_{CA}v'_{B \rightarrow C}}{K_B v_{B \rightarrow C(\text{base})}} \quad (8)$$

The source terms  $s_i$  reflect the release of  $O_2$  and  $CO_2$  as products of the relevant chemical pathways connected to photosynthesis. They are determined by the input of  $O_2$ ,  $CO_2$ , and  $HCO_3^-$  as reactants in those pathways. We first define the cumulative fluxes  $J_{Calvin}$ ,  $J_{phresp}$ , and  $J_{C4}$ .

$$J_{Calvin} = \int v_{CR} \frac{n_C(\mathbf{r})}{n_C(\mathbf{r}) + n_O(\mathbf{r})K_C/K_O + K_C} \chi_p(\mathbf{r}) d^3 \mathbf{r} \quad (9)$$

$$J_{phresp} = \int v_{OR} \frac{n_O(\mathbf{r})}{n_O(\mathbf{r}) + n_C(\mathbf{r})K_O/K_C + K_O} \chi_p(\mathbf{r}) d^3 \mathbf{r} \quad (10)$$

$$J_{C4} = \int v_{BCP} \frac{n_B(\mathbf{r})}{n_B(\mathbf{r}) + K_B} \chi_c(\mathbf{r}) d^3\mathbf{r} \quad (11)$$

The source terms are

$$s_O(\mathbf{r}) = \chi_p(\mathbf{r}) \frac{J_{Calvin} + J_{phresp}}{V_p} \quad (12)$$

$$s_C(\mathbf{r}) = \chi_p(\mathbf{r}) \frac{J_{C4}}{V_p} + \chi'_c(\mathbf{r}) \frac{\frac{1}{2} J_{phresp}}{V'_c} \quad (13)$$

$$s_B = 0 \quad (14)$$

where  $V_i$  stand for the volumes of particular compartments,  $V_i = \int \chi_i d^3\mathbf{r}$ .  $V'_c$  (and corresponding  $\chi'_c$ ) stands for the part of the peripheral cytoplasmic space accessible to the mitochondria (excluding the narrow cytoplasmic gaps between the chloroplast and the cell and vacuole membranes).

The oxygen source term corresponds to the Hill reaction at the thylakoid, which is tied to RuBP carboxylation and oxygenation rates through NADPH flux balance: the production of NADPH via the linear electron transfer chain must match its consumption by the Calvin-Benson cycle and photorespiration. The  $\text{CO}_2$  source term corresponds to the photorespiratory  $\text{CO}_2$  release in the mitochondria and the release of  $\text{CO}_2$  from the  $\text{C}_4$  acid decarboxylation in the stroma.

The diffusion constant of a species in a particular compartment,  $D_i$ , is equal to the diffusion constant of that species in water  $D_{i,aq}$  divided by the relative viscosity of the liquid filling the compartment with respect to water (as in (3)).

$$D_i(\mathbf{r}) = D_{i,aq} \left( \frac{\chi_p(\mathbf{r})}{\eta_p} + \frac{\chi_c(\mathbf{r})}{\eta_c} + \frac{\chi_v(\mathbf{r})}{\eta_v} \right) \quad (15)$$

However, within the tonoplast membrane and the chloroplast envelope, the diffusion coefficient is set to reflect the permeability of the particular barrier. For a barrier with thickness  $L$  and permeability  $\sigma$ , we have

$$D_{within} = L\sigma \quad (16)$$

Diffusion through the cell wall and plasmalemma is modelled by a boundary condition connecting the current density of  $\text{CO}_2$  and  $\text{O}_2$  perpendicular to the boundary surface with the difference between the local and equilibrium gas concentrations:

$$D_i \nabla n_i(\mathbf{r} \in \partial\Omega) = \sigma_c (n_{i,eq} - n_i(\mathbf{r} \in \partial\Omega)) \hat{\mathbf{e}}_{\partial\Omega} = \sigma_c (H_i p_i - n_i(\mathbf{r} \in \partial\Omega)) \hat{\mathbf{e}}_{\partial\Omega} \quad (17)$$

Here  $i$  stands for  $\text{O}_2$  or  $\text{CO}_2$  (we assume  $\text{HCO}_3^-$  cannot cross the plasmalemma),  $\partial\Omega$  is the cell boundary surface and  $\hat{\mathbf{e}}_{\partial\Omega}$  is the unit vector perpendicular to that surface.  $\sigma_c$  is the combined permeability of the cell wall and the plasmalemma, while  $n_{i,eq}$  is the stationary dissolved concentration of  $\text{CO}_2/\text{O}_2$  in the thin wetting layer outside the cell wall, which is presumed to be in thermal equilibrium with the pressure,  $p_i$ , of the respective gas in the internal airspace:  $n_{i,eq} = H_i p_i$  ( $H_i$  is the Henry constant). At other boundary surfaces we assume von Neumann boundary conditions, i.e. there is no current in or out of the simulated region

$$\nabla n_i(\mathbf{r} \in \partial\Omega') = 0 \quad (18)$$

Light usage  $J_{photon}$  is evaluated from the overall fluxes in the energy consuming biochemical pathways.

$$J_{photon} = \varphi_{Calvin} J_{Calvin} + \varphi_{phresp} J_{phresp} + \varphi_{C4} J_{C4} \quad (19)$$

where  $\varphi_i$  stand for the photon cost of RuBP and PEP regeneration after each carboxylation or oxygenation event. The net photon cost of carbon assimilation is given by

$$\text{photon cost} = \frac{J_{photon}}{A} \quad (20)$$

where  $A$  is the net carbon assimilation rate (per plastid), which is determined by the competition of the Calvin and photorespiratory pathways:

$$A = J_{Calvin} - \frac{1}{2} J_{phresp} \quad (21)$$

The assimilation rate per cell surface is obtained by dividing  $A$  with the base of the simulated cylinder

$$A_{surf} = \frac{A}{\pi r_p^2 / \phi_{plas/cell}} \quad (22)$$

where  $\phi_{plas/cell}$  is the chloroplast surface coverage (50% by default).

The required light use  $J_{photon}$  is also used to quantify the plastid-light harvesting capacity (LHC) which is expressed per stromal volume.

$$\text{LHC} = \frac{J_{photon}}{V_p} \quad (23)$$

It is compared to the maximal photosynthetically-active solar photon flux,  $j_{PAPF}$ , by considering the fraction of this flux that would be absorbed by an array of plastids in the peripheral cytoplasmic layer of a cell (see Fig. 1d in the main text), at the default surface coverage ratio,  $\phi_{plas/cell}$

$$\text{absorbed fraction} = \frac{J_{photon}}{\pi r_p^2 / \phi_{plas/cell}} : j_{PAPF} \quad (24)$$

We have posed the model in a very general way as a system of nonlinear partial integro-differential equations in three dimensions. In reality we seize the advantage of the postulated cylindrical symmetry of the system. The resulting problem, which is effectively two-dimensional<sup>1</sup>, is solved iteratively by a finite element method on a prespecified simplex mesh. The mesh is algorithmically constructed to follow the natural boundaries of the simulated system (i.e. the internal and external surface of the envelope and the tonoplast membrane). We use DUNE/PDELab libraries with BCGS solver on  $P_2$  elements (4; 5). As nonlinear PDE's require iterative solving, there is a natural way to include our integrative flux-balance conditions by updating the source terms with each iteration. The ability of the mesh to accurately capture the PDE solution was tested by comparing the typical results for meshes with different levels of

<sup>1</sup>Some care must be taken in converting the three-dimensional Laplacian from cylindrical coordinates into a two-dimensional Laplacian. The three-dimensional Laplacian is  $\nabla^2 = \frac{1}{r} \frac{\partial}{\partial r} \left( r \frac{\partial}{\partial r} \right) + \frac{1}{r^2} \frac{\partial^2}{\partial \varphi^2} + \frac{\partial^2}{\partial z^2}$ , which (for a cylindrically symmetric case with  $\frac{\partial^2}{\partial \varphi^2} = 0$ ) simplifies into  $\nabla^2 = \frac{1}{r} \frac{\partial}{\partial r} + \nabla_{2D}^2$  where  $\nabla_{2D}^2 = \frac{\partial^2}{\partial r^2} + \frac{\partial^2}{\partial z^2}$  is the two-dimensional Laplacian used on the finite-element-method mesh. The  $\frac{1}{r} \frac{\partial}{\partial r}$  term is an additional 'pseudo-source' term that appears in the 2D formulation.

113 precision (Fig J in S1 Figures). Upon achieving convergence, the integrated currents ( $J_{Calvin}$ ,  $J_{phresp}$ , and  $J_{C4}$ ) at  
114 different mesh precisions differed by less than 2 parts in  $10^4$ . Fig K in S1 Figures shows exemplary solutions with and  
115 without an active  $C_4$  cycle.

116 The light-limited operation can be simulated by also evaluating the energy usage  $J_{photon}$  during each iteration and  
117 scaling the concentration of RubisCO and PEPC, if the usage exceeds some capping threshold  $J_{cap}$ .

$$118 \quad c_{R/P}^{n+1} = \min \left( c_{R/P(\text{base})}, c_{R/P}^n \frac{J_{cap}}{J_{photon}^n} \right) \quad (25)$$

119 where we denoted the iteration number in the superscript.

## 120 **Model implementation**

121 For iterative solving of the system of coupled integral and partial-differential equations, a custom C++ code  
122 was assembled, utilising the publicly available Dune/PDElab framework for finite-element-method integration. Pre-  
123 integration mesh construction and subsequent data analysis and visualisation were done by custom Python scripts  
124 relying on the publicly available NumPy/SciPy and Matplotlib libraries.

## **References**

- [1] Witzel F, Götze J, Ebenhöf O. Slow deactivation of ribulose 1,5-bisphosphate carboxylase/oxygenase elucidated by mathematical models. The FEBS Journal. 2010;277(4):931–950. doi:10.1111/j.1742-4658.2009.07541.x.
- [2] Johnson KS. Carbon dioxide hydration and dehydration kinetics in seawater1. Limnol Oceanogr. 1982;27(5):849–855. doi:10.4319/lo.1982.27.5.0849.
- [3] Tholen D, Zhu XG. The Mechanistic Basis of Internal Conductance: A Theoretical Analysis of Mesophyll Cell Photosynthesis and CO<sub>2</sub> Diffusion. Plant Physiol. 2011;156(1):90–105. doi:10.1104/pp.111.172346.
- [4] Blatt M, Burchardt A, Dedner A, Engwer C, Fahlke J, Flemisch B, et al. The Distributed and Unified Numerics Environment, Version 2.4. University Library Heidelberg; 2016.
- [5] Alkämper M, Dedner A, Klöfkor R, Nolte M. The DUNE-ALUGrid Module. Archive of Numerical Software. 2016;4(1):1–28. doi:10.11588/ans.2016.1.23252.
